# Supplementary material for: Assessing the Rheological, Mechanical, and Photocatalytic Properties of Niobium Oxide-Incorporated White Cement Pastes
Source: MDPI journal article supplement (doi:10.3390/ma16114090), 2023-05-31
Supplement: s1 [file s1]

## **Assessing the Rheological, Mechanical, and Photocatalytic Properties of Niobium Oxide-Incorporated White Cement Pastes**

Laura Silvestro<sup>1\*</sup>, Caroline Maroli<sup>2</sup>, Brenda Koch<sup>2</sup>, Artur Spat Ruviano<sup>3</sup>, Geannina Lima<sup>3</sup>, Mariane Kempka<sup>1</sup>, Camila Fabiano de Freitas Marin<sup>2</sup>, Daniela Zambelli Mezalira<sup>2</sup> and Philippe Jean Paul Gleize<sup>3</sup>

<sup>1</sup> Coordenação de Engenharia Civil, Universidade Tecnológica Federal do Paraná (UTFPR), Guarapuava, Brasil; laurasilvestro@utfpr.edu.br; marianekempka@professores.utfpr.edu.br

<sup>2</sup> Programa de Pós-Graduação em Química, Universidade Federal de Santa Catarina (UFSC), Brasil; c.maroli@posgrad.ufsc.br; bbrendakoch@gmail.com, camila.f.freitas@ufsc.br, daniela.z.m@ufsc.br

<sup>3</sup> Laboratório de Aplicação de Nanotecnologia em Construção Civil (NANOTEC), Universidade Federal de Santa Catarina (UFSC), Brasil, arturspatruviano@gmail.com; geanninasantos@hotmail.com; p.gleize@ufsc.br

\* Correspondence: laurasilvestro@utfpr.edu.br

This supplementary file contains the following figures:

**Figure S1** – Example of complete absorbance spectra of Rhodamine B solution during the photodegradation reaction. In this example, commercial Nb<sub>2</sub>O<sub>5</sub> was used as a catalyst in a solution without pH adjustment.

**Figure S2** – Calibration curve of RhB.

**Figure S3** – Absorbance spectra of Rhodamine B solution (pH 10) during the photodegradation reaction with commercial Nb<sub>2</sub>O<sub>5</sub> as a catalyst.

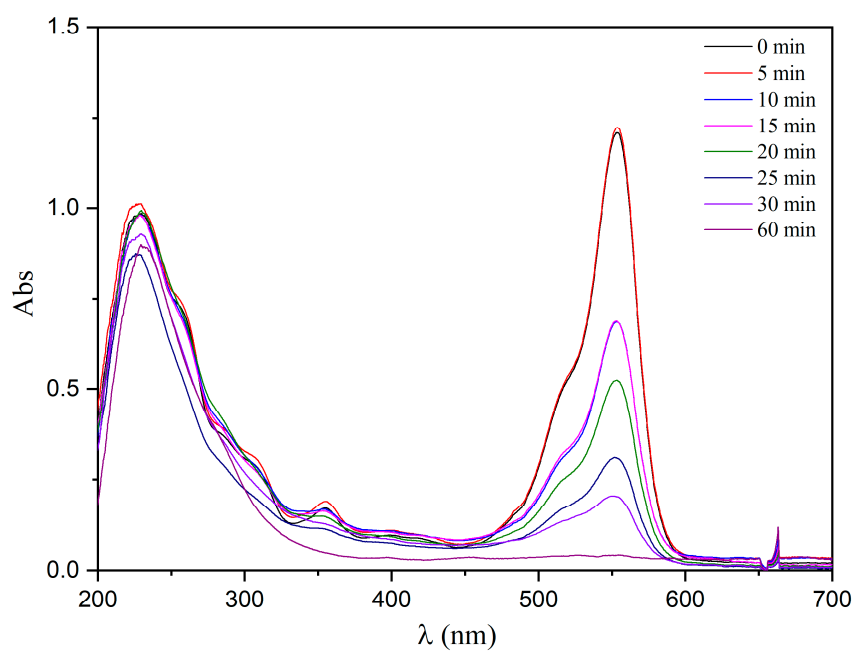

**Figure S1.** Example of complete absorbance spectra of Rhodamine B solution during the photodegradation reaction. In this example, commercial  $\text{Nb}_2\text{O}_5$  was used as a catalyst in a solution without pH adjustment.

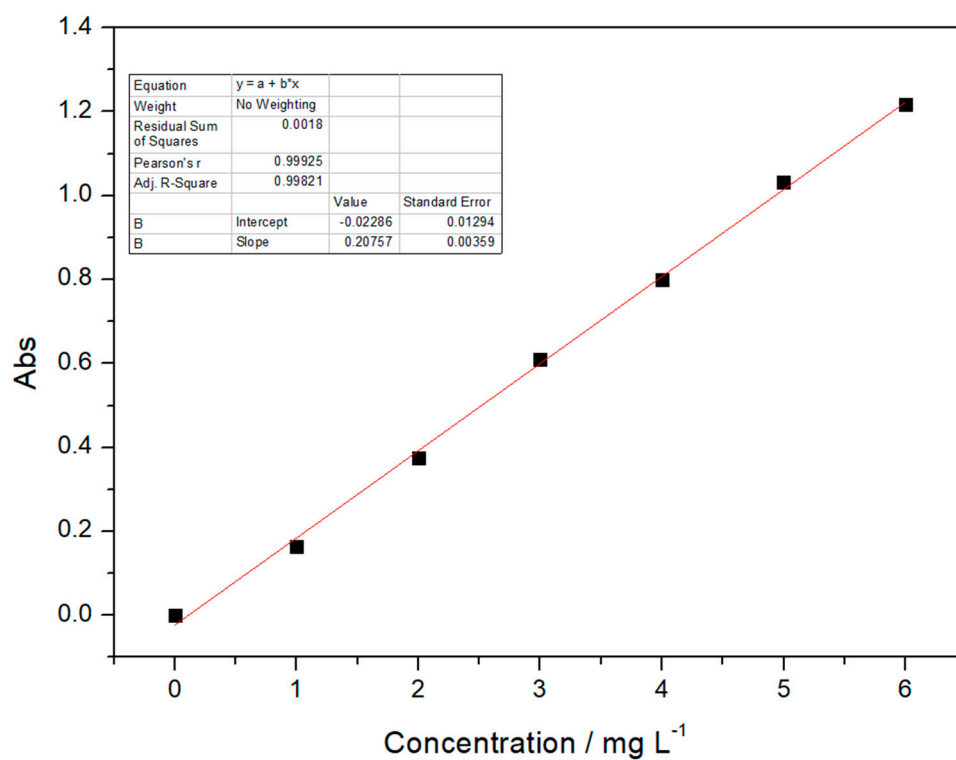

**Figure S2.** Calibration curve of RhB solution.

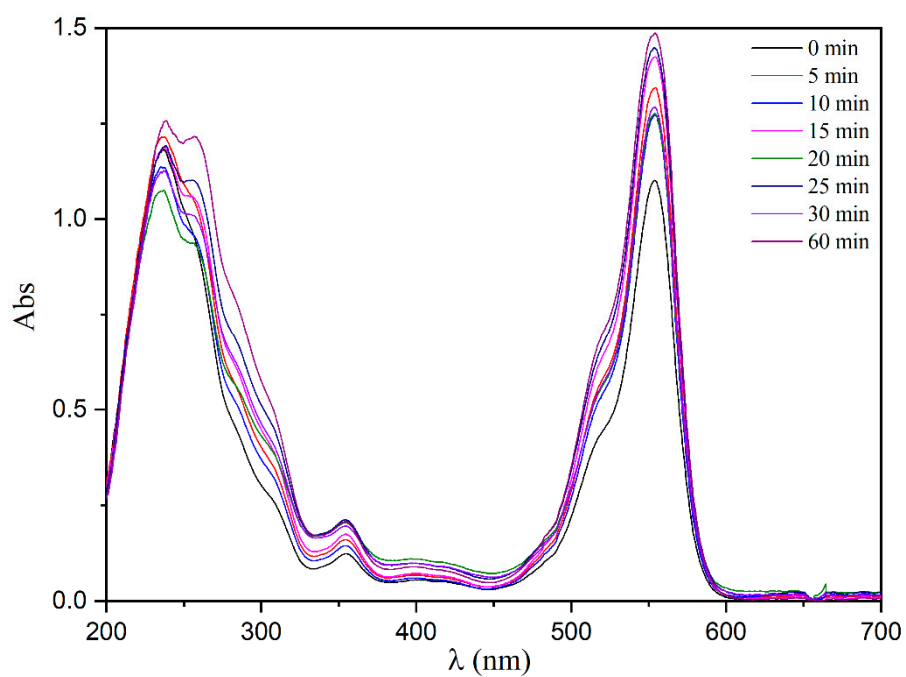

**Figure S3.** Absorbance spectra of Rhodamine B solution (pH 10) during the photodegradation reaction with commercial  $\text{Nb}_2\text{O}_5$  as a catalyst.
